# Supplementary material for: Additive effect of fluoroethylene and difluoroethylene carbonates for the solid electrolyte interphase film formation in sodium-ion batteries: a quantum chemical study
Source: Royal Society of Chemistry journal article supplement (doi:10.1039/c6ra09560g), 2016-01-01
Supplement: c6ra09560g1.pdf [file c6ra09560g1.pdf]

## Supporting information

### **Additive Effect of Fluoroethylene and Difluoroethylene Carbonates for the Solid Electrolyte Interphase Film Formation in Sodium-Ion Batteries: A Quantum Chemical Study**

Uppula Purushotham,<sup>†,‡</sup> Norio Takenaka,<sup>†,§</sup> Masataka Nagaoka<sup>\*,†,‡,§</sup>

<sup>†</sup>Graduate School of Information Science, Nagoya University, Furo-cho, Chikusa-ku, Nagoya 464-8601, Japan;

<sup>‡</sup>Core Research for Evolutional Science and Technology, Japan Science and Technology Agency, Honmachi, Kawaguchi 332-0012, Japan;

<sup>§</sup>ESICB, Kyoto University, Kyodai Katsura, Nishikyo-ku, Kyoto 615-8520, Japan, E-mail: mnagaoka@is.nagoya-u.ac.jp

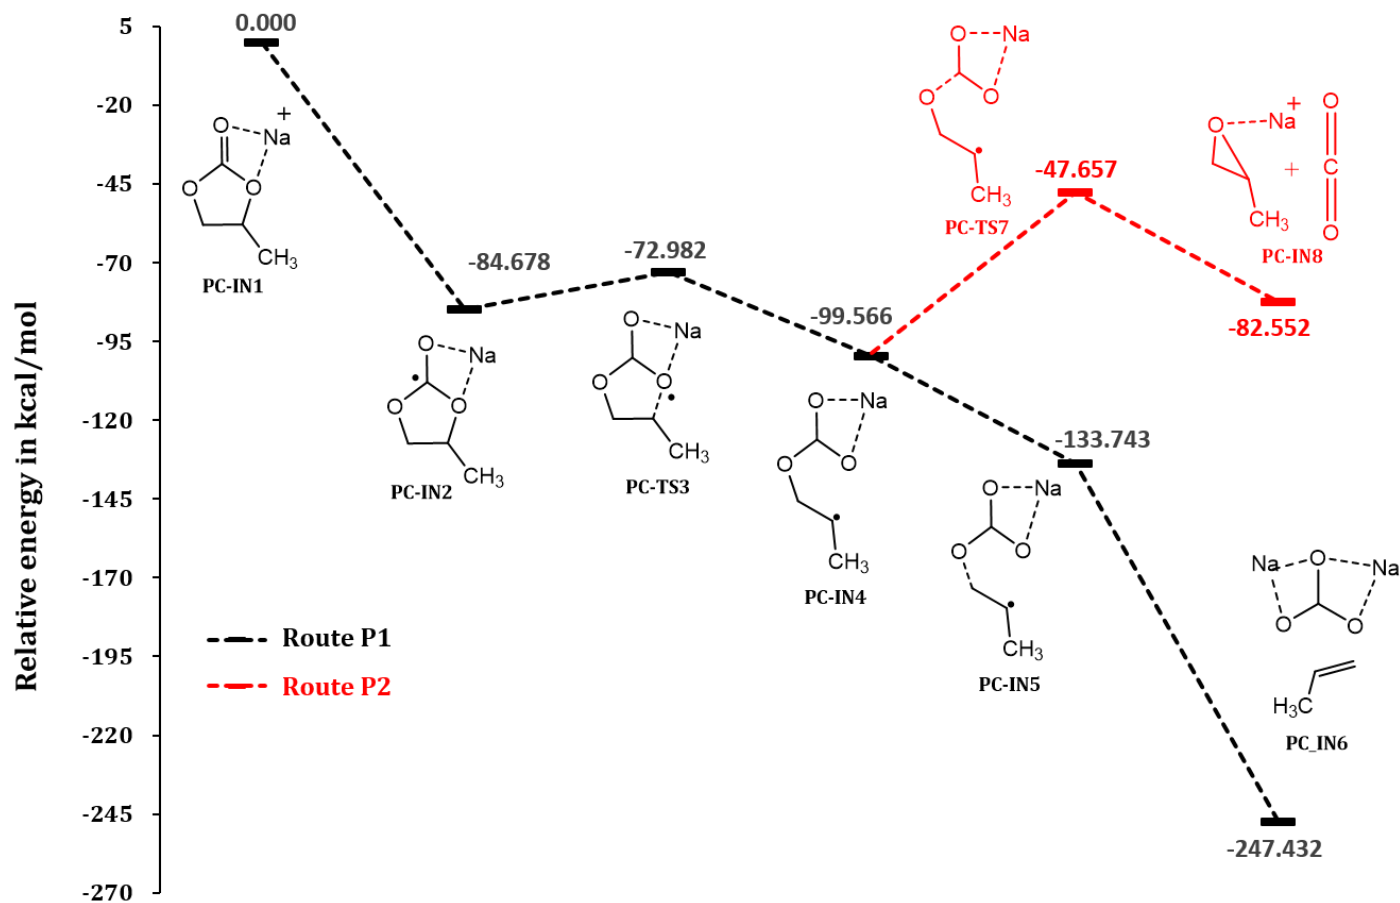

**Figure S1:** Potential energy profiles ( $\Delta E$  in kcal/mol) for the possible reductive decomposition of  $\text{Na}^+$ -propylene carbonate ( $\text{Na}^+$ -PC) in gas phase.

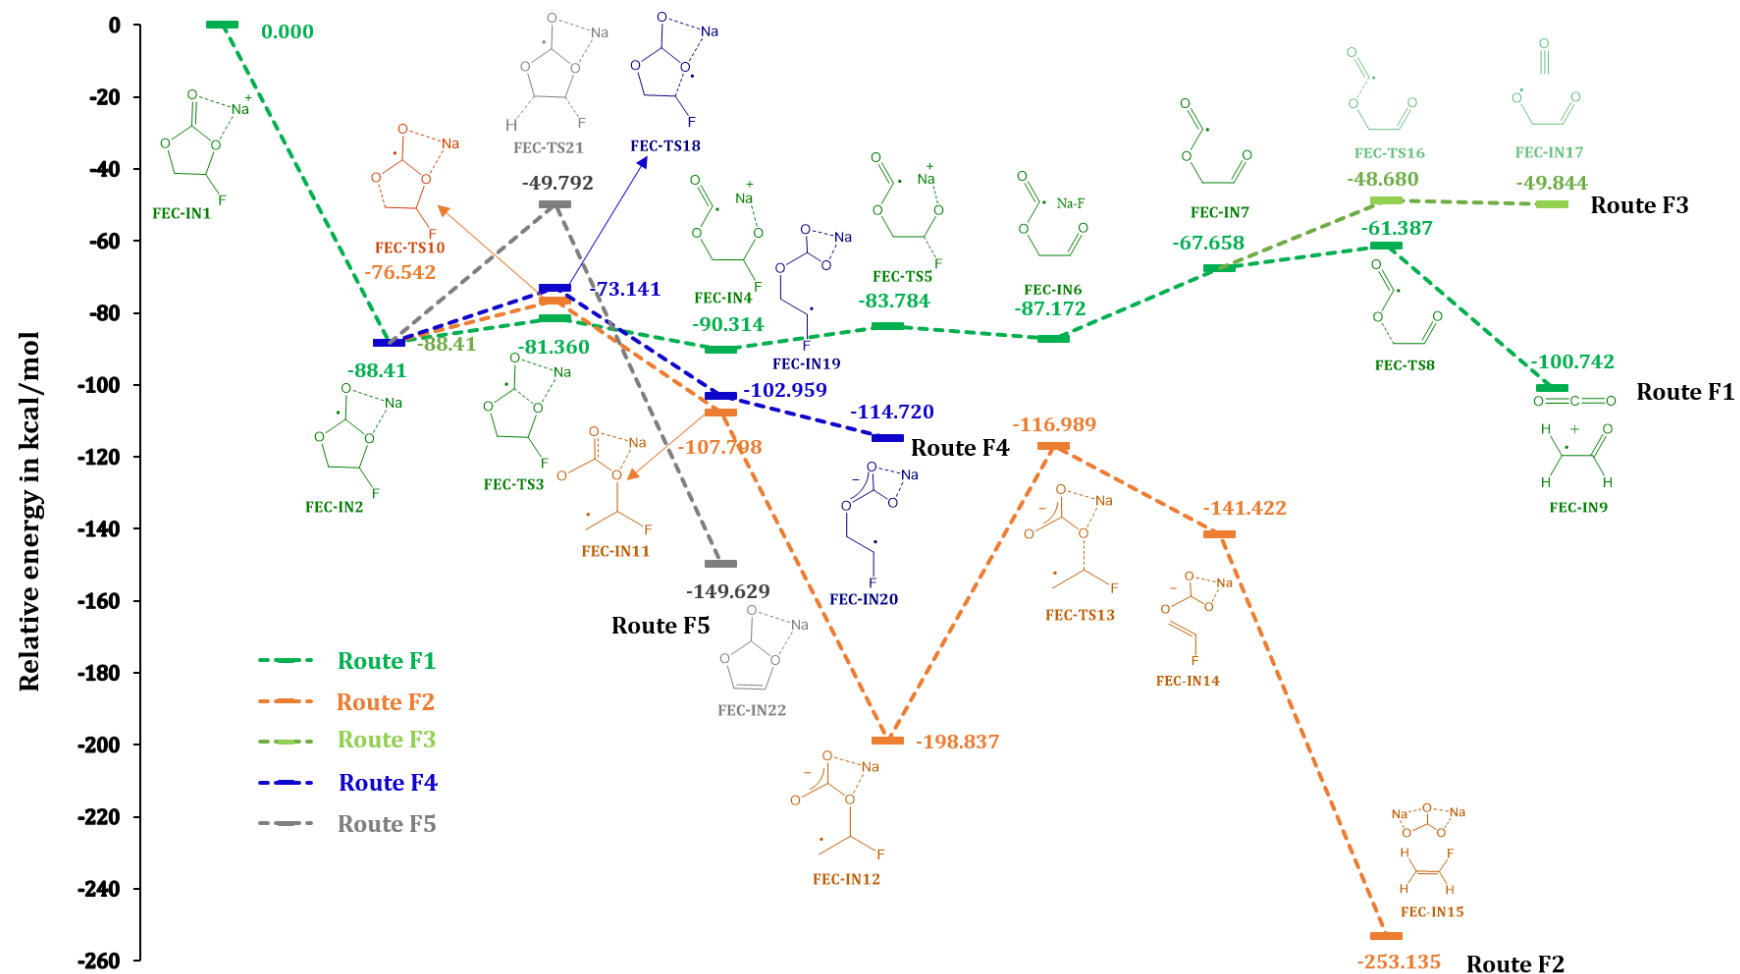

**Figure S2:** Potential energy profiles ( $\Delta E$  in kcal/mol) for the possible reductive decomposition of  $\text{Na}^+$ -FEC in gas phase.

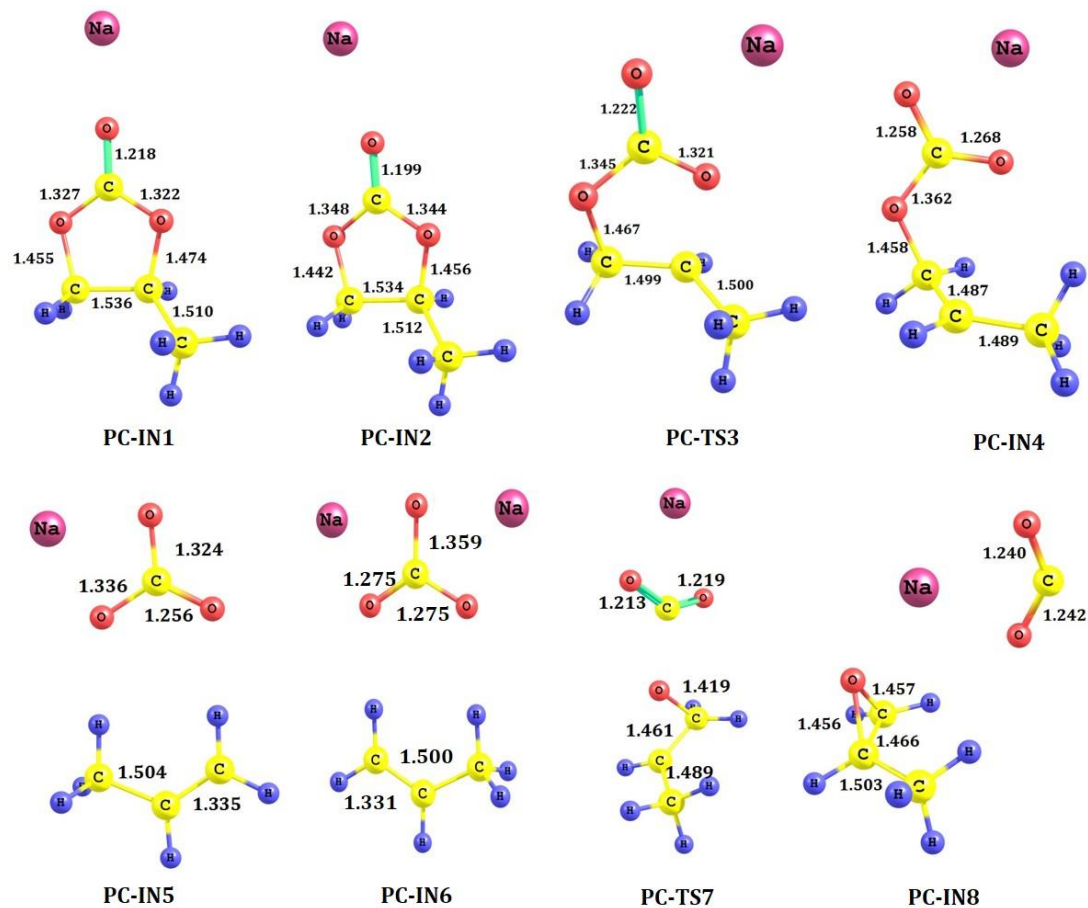

**Figure S3:** Optimized geometries with respective bond lengths of intermediates, products and transition states in the  $\text{Na}^+$ -propylene carbonate ( $\text{Na}^+$ -PC) reductive decomposition mechanism calculated at B3LYP/6-311++G(d,p) level of theory.

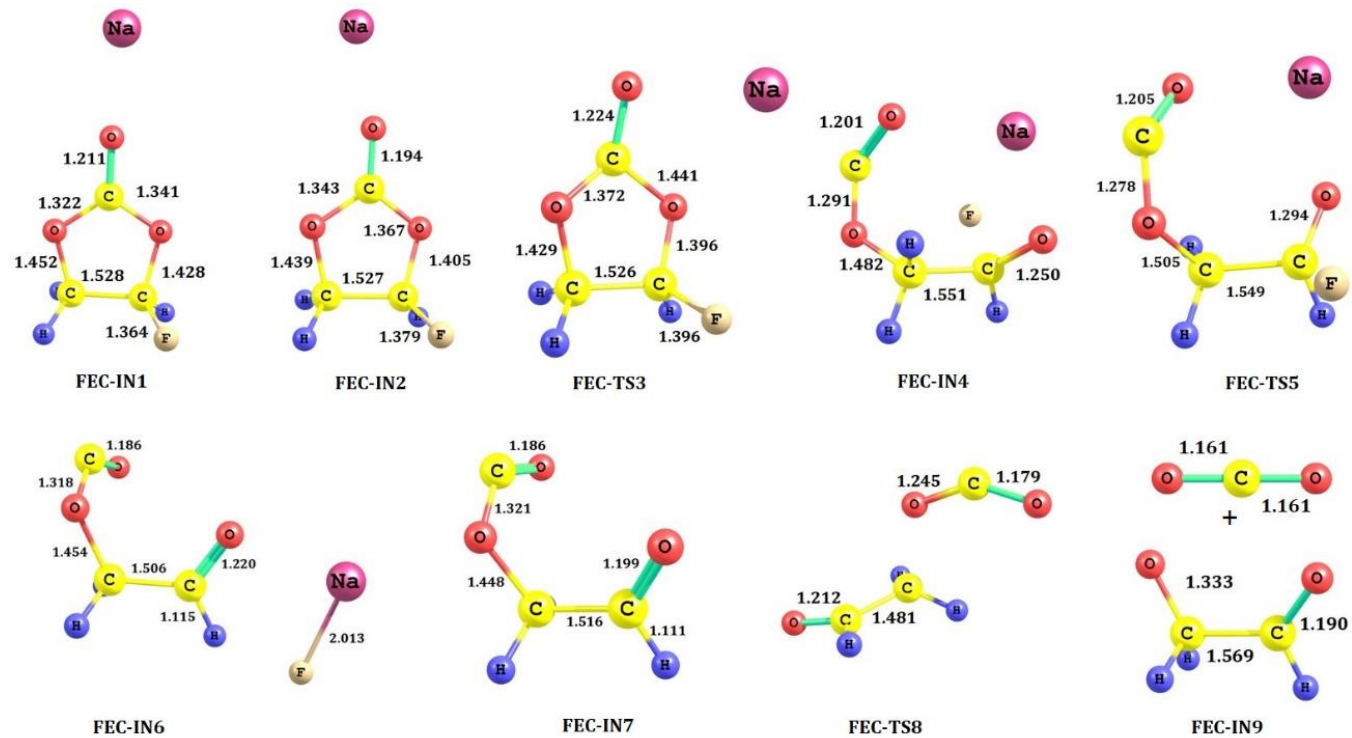

Route 1

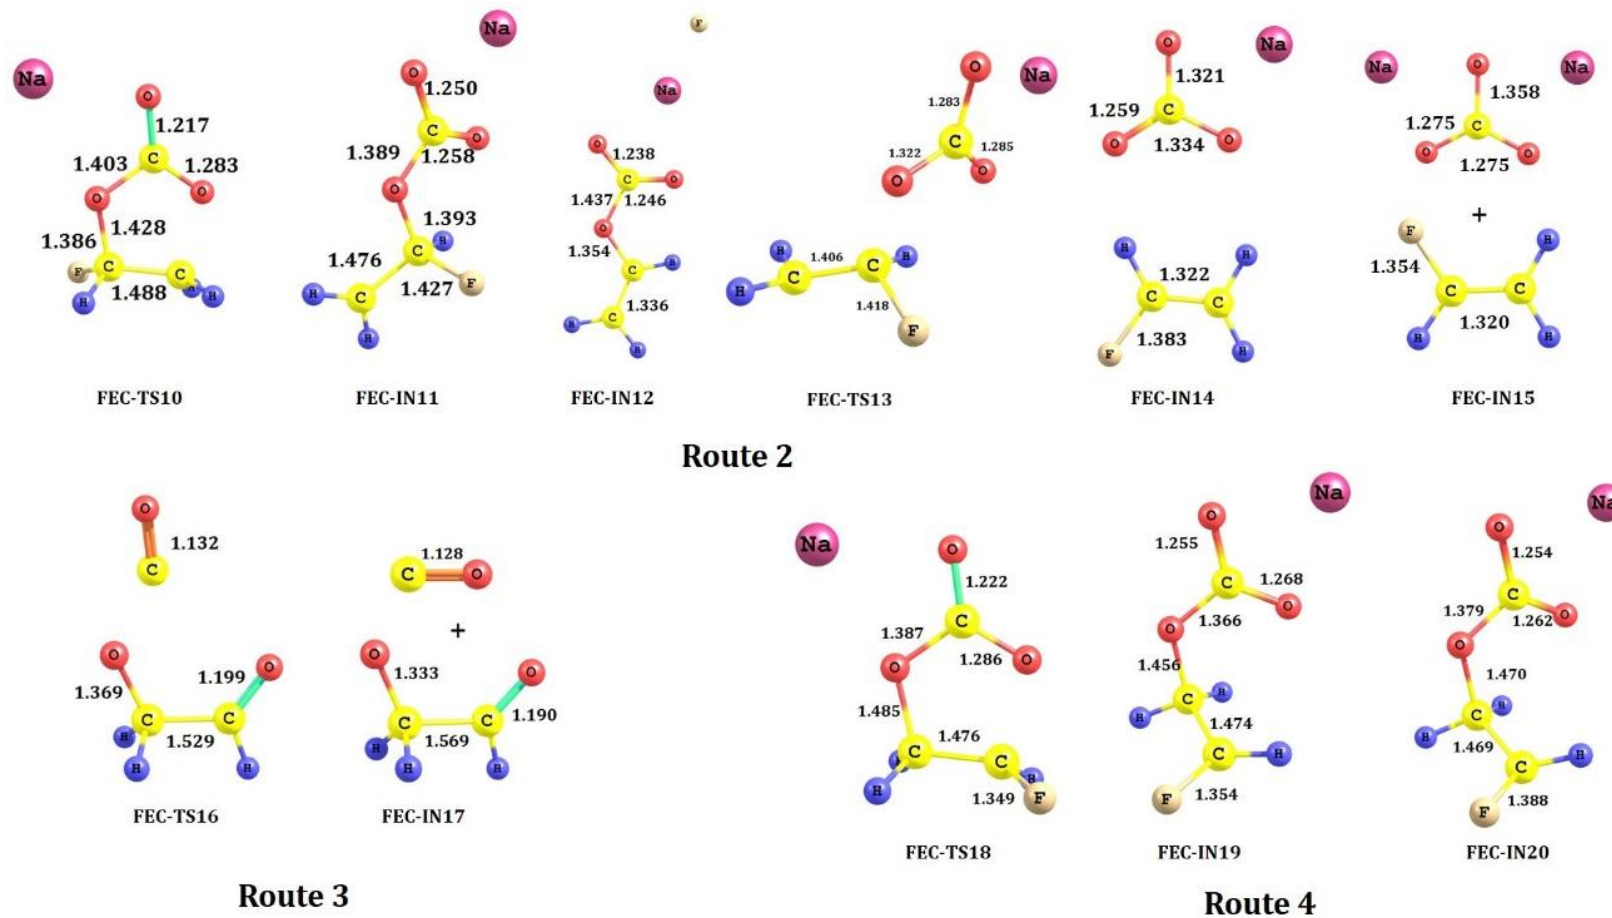

**Figure S4:** Optimized geometries with respective bond lengths of intermediates, products and transition states formed in the  $\text{Na}^+$ -fluoroethylene carbonate ( $\text{Na}^+$ -FEC) reductive decomposition mechanism calculated at B3LYP/6-311++G(d,p) level of theory.

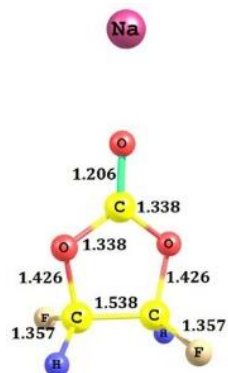

DFEC-IN1

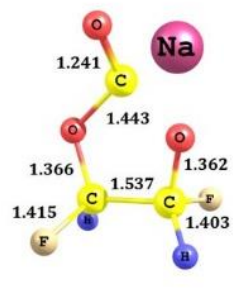

DFEC-IN2

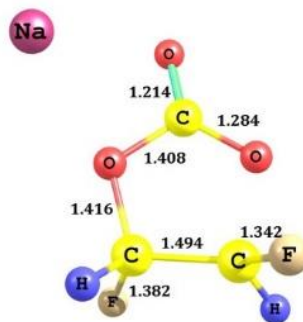

DFEC-TS3

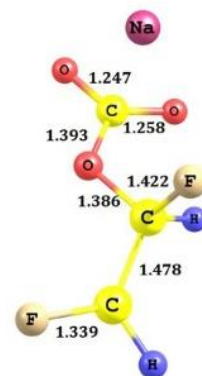

DFEC-IN4

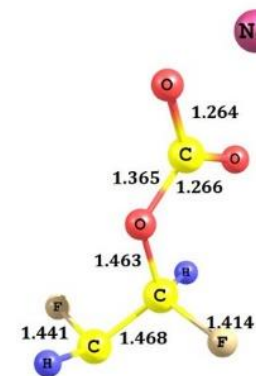

DFEC-IN5

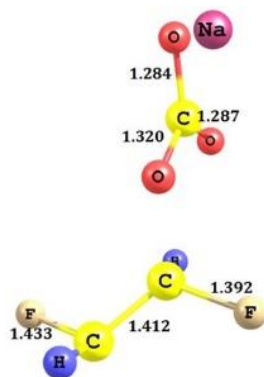

DFEC-TS6

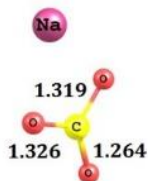

DFEC-IN7

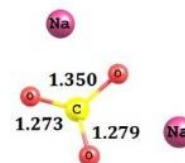

DFEC-IN8

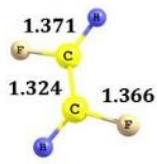

## Route 1

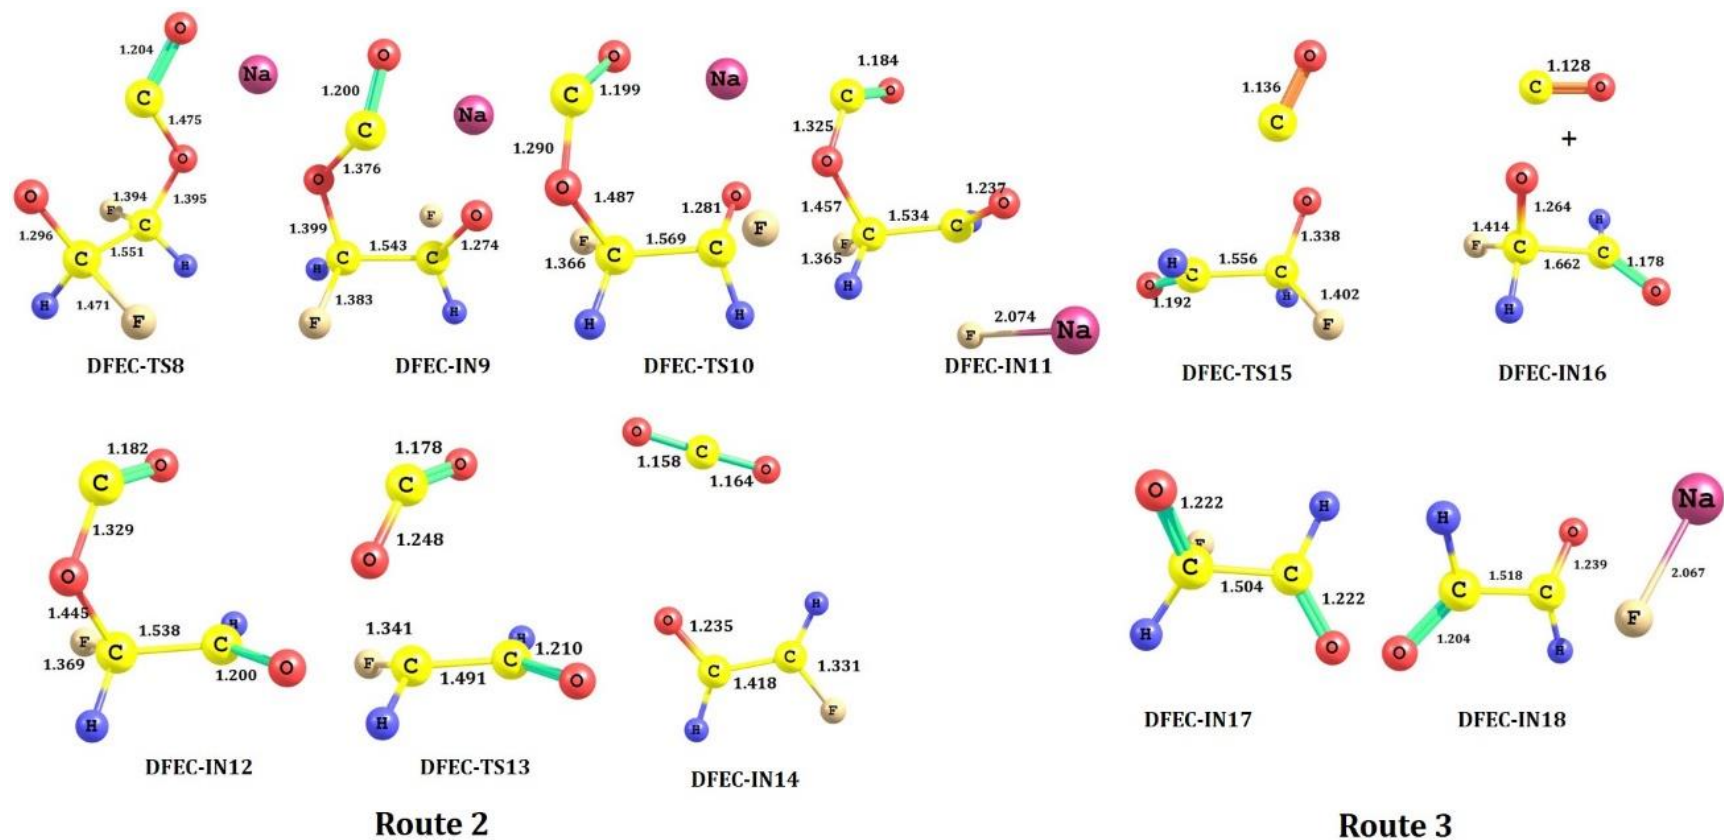

**Figure S5:** Optimized geometries with respective bond lengths of intermediates, products and transition states formed in the  $\text{Na}^+$ -difluoroethylene carbonate ( $\text{Na}^+$ -DFEC) reductive decomposition mechanism calculated at B3LYP/6-311++G(d,p) level of theory.
